# Supplementary material
Source: PubMed Central journal article supplement (PMC2859965)

Supplementary Figure 1. Kedrin et al.

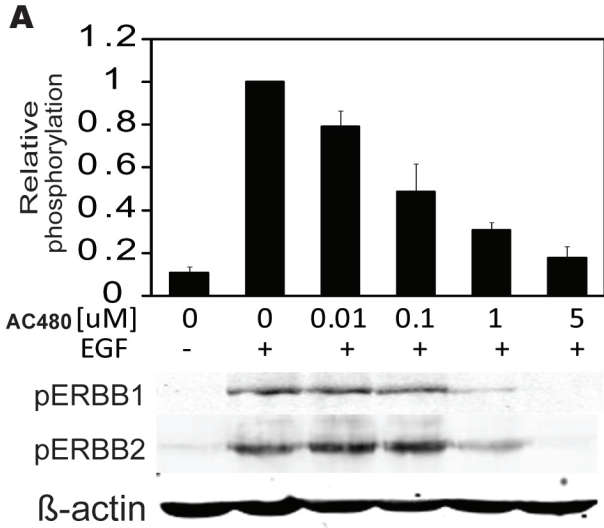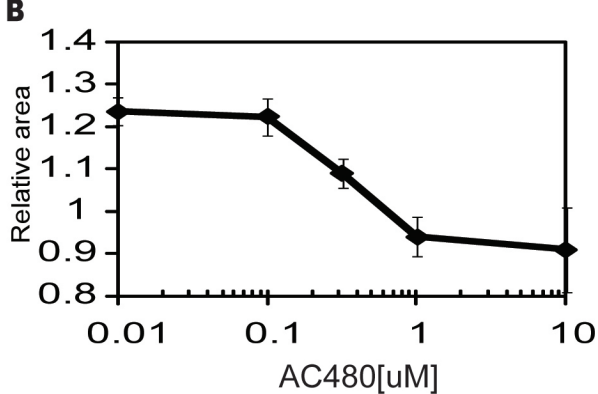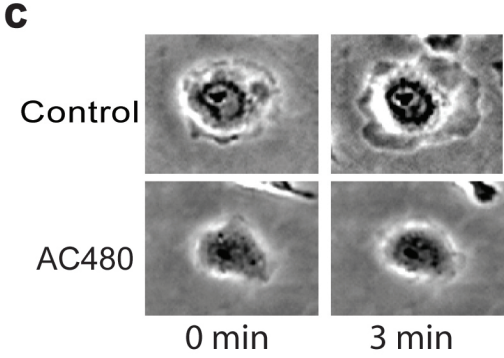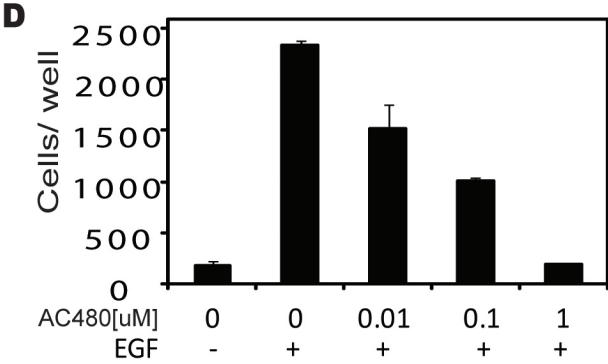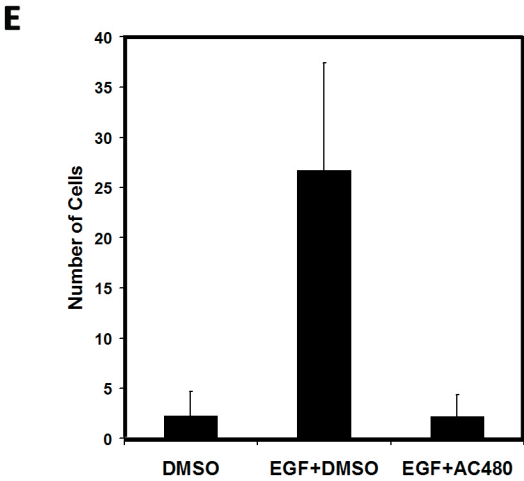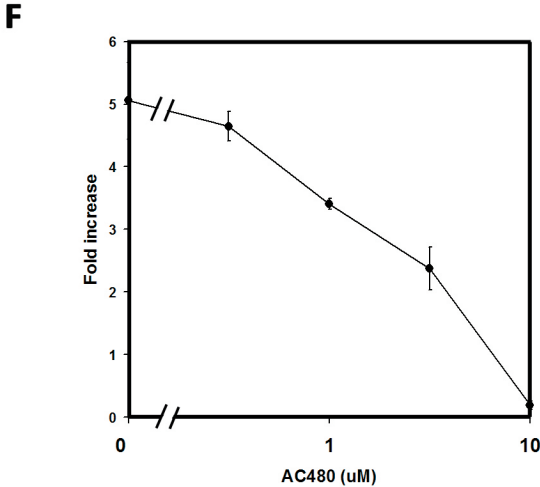

Supplement: NIHMS174770-supplement-Figure_1.pdf [file NIHMS174770-supplement-Figure_1.pdf]

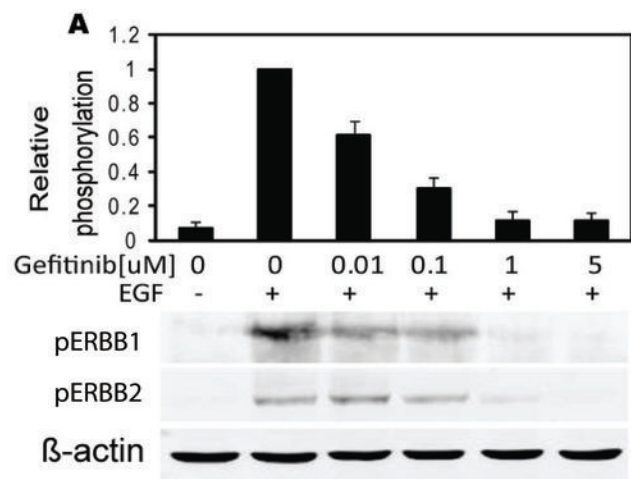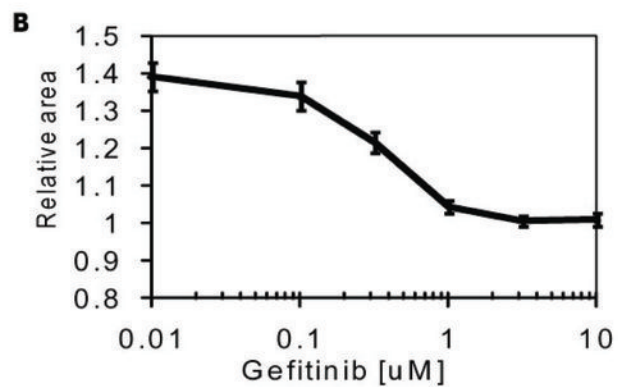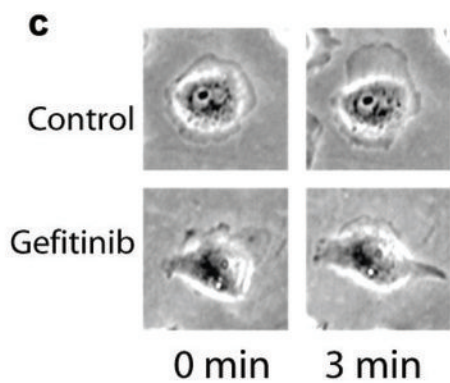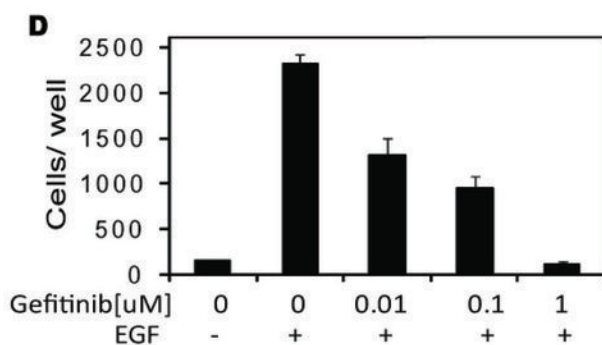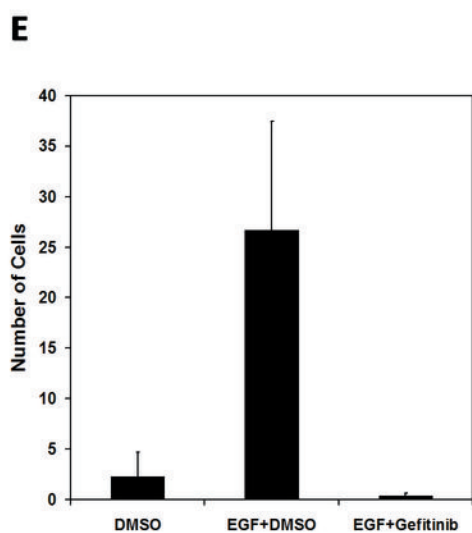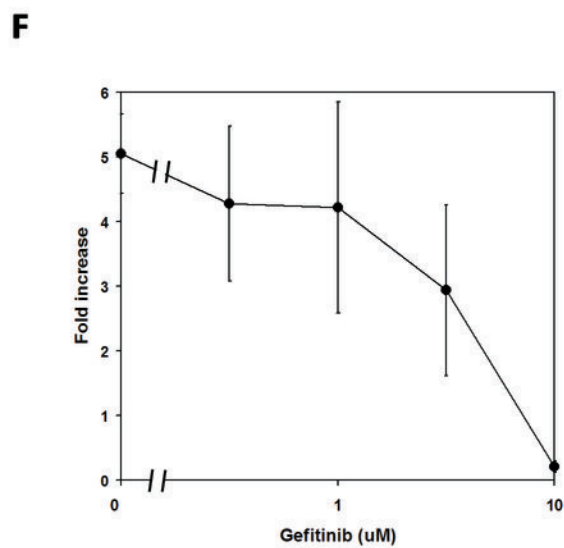

Supplement: NIHMS174770-supplement-Supplementary_Figure_2.pdf [file NIHMS174770-supplement-Supplementary_Figure_2.pdf]
